# Supplementary material for: Fitness consequences of female multiple mating: A direct test of indirect benefits
Source: PubMed Central journal article supplement (PMC3499236; doi:10.1186/1471-2148-12-185), 2012-09-15
Supplement: 1471-2148-12-185-S1.pdf [file 1471-2148-12-185-S1.pdf]

Supporting Information 1 – Total number of individuals and the descendants produced, which were used to calculate the means and confidence intervals for Figures 1, 2 and 3. Viable individuals are those that reach sexual maturation and breeding success is the number of those that successfully produce a first brood.

|                                                    | Total (N) | Viable | Breeding success |
|----------------------------------------------------|-----------|--------|------------------|
| F0 single                                          | 73        | 40     | 40               |
| F0 multiple                                        | 58        | 39     | 39               |
| F1 <i>via</i> single F0                            | 121       | 119    | 85               |
| F1 <i>via</i> multiple F0                          | 154       | 147    | 115              |
| F1 daughter <i>via</i> single F0                   | 63        | 61     | 46               |
| F1 son <i>via</i> single F0                        | 58        | 58     | 39               |
| F1 daughter <i>via</i> multiple F0                 | 63        | 60     | 50               |
| F1 son <i>via</i> multiple F0                      | 91        | 87     | 65               |
| F2 <i>via</i> single F0                            | 335       | 324    |                  |
| F2 <i>via</i> multiple F0                          | 436       | 418    |                  |
| F2 granddaughters <i>via</i> single F0             |           | 167    |                  |
| F2 grandsons <i>via</i> single F0                  | 335       | 157    |                  |
| F2 granddaughters <i>via</i> multiple F0           |           | 217    |                  |
| F2 grandsons <i>via</i> multiple F0                | 436       | 201    |                  |
| F2s <i>via</i> F1 daughters <i>via</i> single F0   | 197       | 191    |                  |
| F2s <i>via</i> F1 sons <i>via</i> single F0        | 140       | 133    |                  |
| F2s <i>via</i> F1 daughters <i>via</i> multiple F0 | 200       | 192    |                  |
| F2s <i>via</i> F1 sons <i>via</i> multiple F0      | 236       | 226    |                  |
