# Supplementary material for: Fitness consequences of female multiple mating: A direct test of indirect benefits
Source: PubMed Central journal article supplement (PMC3499236; doi:10.1186/1471-2148-12-185), 2012-09-15
Supplement: 1471-2148-12-185-S2.pdf [file 1471-2148-12-185-S2.pdf]

Supporting Information 2 – Model selection using values of  $\Delta AIC$  (Akaike weights). k: Number of parameters of the model. The estimated best fitting model is shaded in grey.

| Model                          | k | Size at birth         |                      | Growth rate           |                       | Time to sexual maturation |                       |
|--------------------------------|---|-----------------------|----------------------|-----------------------|-----------------------|---------------------------|-----------------------|
|                                |   | F1                    | F2                   | F1                    | F2                    | F1                        | F2                    |
| Single-mean                    | 1 | 185.9<br>( $<0.001$ ) | 88.1<br>( $<0.001$ ) | 124.9<br>( $<0.001$ ) | 191.1<br>( $<0.001$ ) | 92.80<br>( $<0.001$ )     | 75.27<br>( $<0.001$ ) |
| Fixed-effect (treatment)       | 2 | 187.0<br>( $<0.001$ ) | 88.9<br>( $<0.001$ ) | 121.0<br>( $<0.001$ ) | 192.1<br>( $<0.001$ ) | 94.00<br>( $<0.001$ )     | 71.64<br>( $<0.001$ ) |
| Random-effect (tank)           | 3 | 0.0<br>(0.680)        | 0.0<br>(0.723)       | 0.0<br>(0.639)        | 0.0<br>(0.731)        | 0.0<br>(0.731)            | 0.0<br>(0.580)        |
| Mixed-effect (treatment, tank) | 4 | 1.5<br>(0.320)        | 1.9<br>(0.277)       | 1.1<br>(0.361)        | 2.0<br>(0.269)        | 2.0<br>(0.269)            | 0.633<br>(0.421)      |
